# Supplementary material for: A Transparent Hydrogel-Ionic Conductor with High Water Retention and Self-Healing Ability
Source: MDPI journal article supplement (doi:10.3390/ma17020288), 2024-01-06
Supplement: s1 [file s1]

# Supplementary Information

## A Transparent Hydrogel-Ionic Conductor with High Water Retention and Self-Healing Ability

Yangwoo Lee <sup>1</sup>, Ju-Hee So <sup>2,\*</sup> and Hyung-Jun Koo <sup>1,\*</sup>

<sup>1</sup> Department of Chemical & Biomolecular Engineering, Seoul National University of Science & Technology, 232 Gongneung-ro, Nowon-gu, Seoul 01811, Republic of Korea; diddnqkqh@gmail.com

<sup>2</sup> Material & Component Convergence R&D Department, Korea Institute of Industrial Technology, Ansan 15588, Republic of Korea

\*Correspondence: jso@kitech.re.kr (J.-H.S.); hjkoo@seoultech.ac.kr (H.-J.K.)

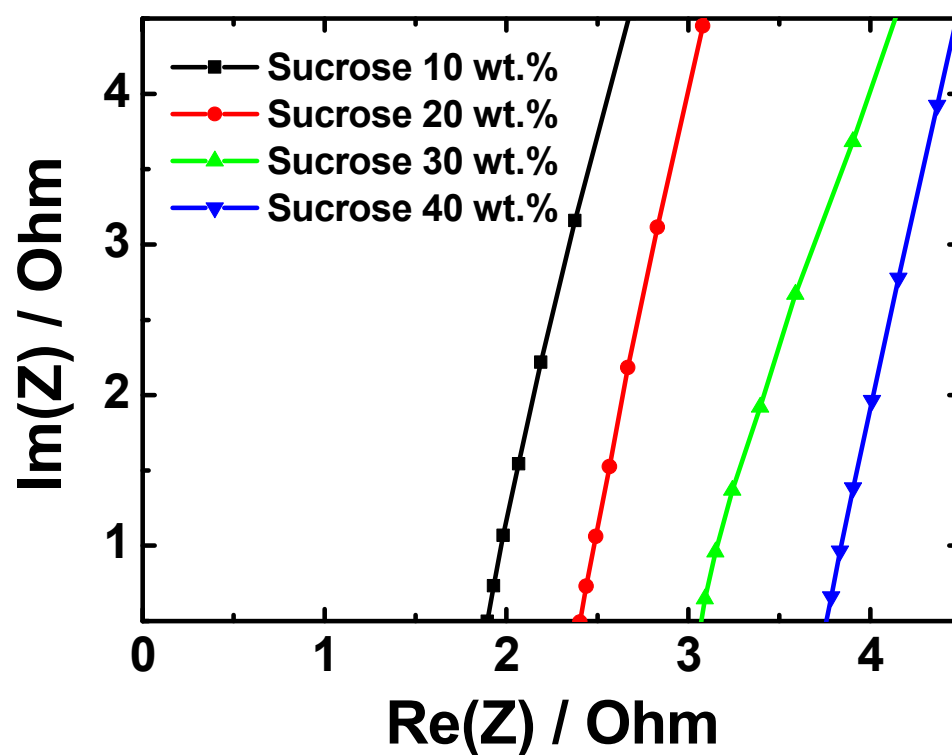

**Supplementary Figure S1.** Nyquist plots of NaCl-Suc/A hydrogels with different sucrose concentrations. The concentration of NaCl is 2M. AC frequency range is 0.1 Hz–1000 kHz.

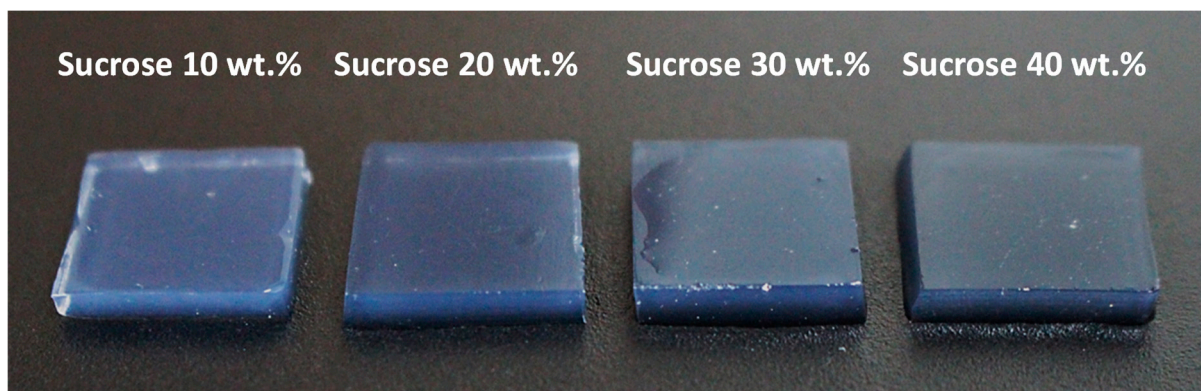

**Supplementary Figure S2.** Photograph of as-prepared NaCl-Suc/A hydrogels with different sucrose concentrations.
